# Supplementary material for: A Revised Phylogeny of the Mentha spicata Clade Reveals Cryptic Species
Source: MDPI journal article supplement (doi:10.3390/plants10040819), 2021-04-20
Supplement: s1 [file s1]

**Table S2**      **Overview of variables used for phenotype description**

| nr. | variable                                                                                                        | type & unit          | derived                                                                            | selected variables (DA/Ward) |
|-----|-----------------------------------------------------------------------------------------------------------------|----------------------|------------------------------------------------------------------------------------|------------------------------|
| 1   | bract - length                                                                                                  | C (mm)               |                                                                                    | W                            |
| 2   | bract hairs - density estimate                                                                                  | O (6 classes)        |                                                                                    | W                            |
| 3   | bracteole (lowest) - length                                                                                     | C (mm)               |                                                                                    | W                            |
| 4   | bracteole (lowest) - width                                                                                      | C (mm)               |                                                                                    | W                            |
| 5   | bracteole hairs - length                                                                                        | C (mm)               |                                                                                    | W                            |
| 6   | bracteoles - position (fully bending outward of spike = max.)                                                   | O (9 classes)        |                                                                                    | W                            |
| 7   | calyx hairs - density estimate                                                                                  | O (5 classes)        |                                                                                    | W                            |
| 8   | calyx hairs - length (max.)                                                                                     | C (μm)               |                                                                                    |                              |
| 9   | calyx hairs - length estimate of hairs at the lower side                                                        | O (4 classes)        |                                                                                    | W                            |
| 10  | calyx hairs - length estimate of hairs at the upper side                                                        | O (4 classes)        |                                                                                    | W                            |
| 11  | calyx hairs - max. length class (lower+upper)                                                                   | O (4 classes)        | from nr. 9-10                                                                      |                              |
| 12  | calyx hairs - difference between upper and lower side length estimate                                           | O (8 classes)        | from nr. 9-10                                                                      | W                            |
| 13  | calyx hairs - stiffness estimate                                                                                | O (3classes)         |                                                                                    | W                            |
| 14  | calyx peduncle - length                                                                                         | C (mm)               |                                                                                    | W                            |
| 15  | calyx peduncle - width excluding hairs                                                                          | C (μm)               |                                                                                    | W                            |
| 16  | calyx peduncle hairs - width of hairs over peduncle width                                                       | C (%)                |                                                                                    | W                            |
| 17  | calyx teeth 1-5 - length times width over area (average)                                                        | C (%)                | originally from 20 measured variables: length, width, perimeter, area of calyx 1-5 | W                            |
| 18  | calyx teeth 1-5 - length times width over area (trimmed average)                                                | C (%)                |                                                                                    |                              |
| 19  | calyx teeth 1-5 - length times width over area (difference median and trimmed average)                          | C (%)                |                                                                                    | W                            |
| 20  | calyx teeth 1-5 - length times width over area (difference median and trimmed average over the trimmed average) | C (%)                |                                                                                    |                              |
| 21  | calyx teeth 1-5 - length times width over area (maximal difference 1-5)                                         | C (%)                |                                                                                    | W                            |
| 22  | calyx teeth 1-5 - length times width over area (maximal difference 1-5 over the average)                        | C (%)                |                                                                                    |                              |
| 23  | calyx teeth 1-3 - length (average)                                                                              | C (mm)               |                                                                                    |                              |
| 24  | calyx teeth 4-5 - length (average)                                                                              | C (mm)               |                                                                                    |                              |
| 25  | calyx teeth 1-5 - length (maximum)                                                                              | C (mm)               |                                                                                    |                              |
| 26  | calyx teeth 1-5 - length (minimum)                                                                              | C (mm)               |                                                                                    | W                            |
| 27  | calyx teeth 1-5 - length (difference max.-min. over max.)                                                       | C (%)                |                                                                                    | DA / W                       |
| 28  | calyx teeth 1-3 - area (average)                                                                                | C (mm <sup>2</sup> ) |                                                                                    |                              |
| 29  | calyx teeth 4-5 - area (average)                                                                                | C (mm <sup>2</sup> ) |                                                                                    |                              |
| 30  | calyx teeth 1-5 - area (maximum)                                                                                | C (mm <sup>2</sup> ) |                                                                                    | W                            |
| 31  | calyx teeth 1-5 - area (minimum)                                                                                | C (mm <sup>2</sup> ) |                                                                                    |                              |
| 32  | calyx teeth 1-5 - area (difference max.-min. over max.)                                                         | C (%)                |                                                                                    | DA / W                       |
| 33  | calyx teeth 1-3 - perimeter (average)                                                                           | C (mm)               |                                                                                    |                              |
| 34  | calyx teeth 4-5 - perimeter (average)                                                                           | C (mm)               |                                                                                    |                              |
| 35  | calyx teeth 1-5 - perimeter (maximum)                                                                           | C (mm)               |                                                                                    |                              |
| 36  | calyx teeth 1-5 - perimeter (minimum)                                                                           | C (mm)               |                                                                                    |                              |
| 37  | calyx teeth 1-5 - perimeter (difference max.-min. over max.)                                                    | C (%)                |                                                                                    |                              |
| 38  | calyx teeth 1-5 - summed perimeters over summed areas                                                           | C (mm-1)             |                                                                                    | W                            |

|    |                                                                                                                                                               |                      |  |        |
|----|---------------------------------------------------------------------------------------------------------------------------------------------------------------|----------------------|--|--------|
| 39 | calyx teeth 1-5 - summed lengths over half of the summed perimeters                                                                                           | C (%)                |  | W      |
| 40 | calyx teeth 1-3 shape - triangle (perfect triangle = max., imploded triangle sides = min.)                                                                    | O (6 classes)        |  |        |
| 41 | calyx teeth 4-5 shape - triangle (perfect triangle = max., imploded triangle sides = min.)                                                                    | O (6 classes)        |  | W      |
| 42 | calyx teeth base 1-5 - corner at base of between-teeth interval (median)                                                                                      | C (degrees)          |  | W      |
| 43 | calyx teeth base 1-5 - inter-teeth shape (perfect U = max., perfect V = min.)                                                                                 | O (6 classes)        |  | W      |
| 44 | calyx tube - length                                                                                                                                           | C (mm)               |  | W      |
| 45 | crown tube - length                                                                                                                                           | C (mm)               |  | W      |
| 46 | crown colour - blue                                                                                                                                           | O (RGB value)        |  | DA / W |
| 47 | crown colour - green                                                                                                                                          | O (RGB value)        |  |        |
| 48 | crown colour - red                                                                                                                                            | O (RGB value)        |  | W      |
| 49 | crown colour continuity - from no distinct colouring, spots (small, medium, large), banding pattern (broken band, small band, strong band), to fully coloured | O (8 classes)        |  | W      |
| 50 | crown hairiness                                                                                                                                               | O (3 classes)        |  |        |
| 51 | spike (main rachis) - conicity (fully conical = max., fully cylindrical = min.)                                                                               | O (4 classes)        |  | W      |
| 52 | spike (main rachis) - contiguity (strongly interrupted = max., fully contiguous = min.)                                                                       | O (9 classes)        |  | W      |
| 53 | spike (main rachis) - length                                                                                                                                  | C (mm)               |  | W      |
| 54 | spike (main rachis) - width                                                                                                                                   | C (mm)               |  | W      |
| 55 | spike cymes (main rachis) - number                                                                                                                            | C (n)                |  | W      |
| 56 | leaf appearance - leathery                                                                                                                                    | O (3 classes)        |  | W      |
| 57 | leaf appearance - glabrosity (from almost glabrous to completely glabrous)                                                                                    | O (5 classes)        |  | W      |
| 58 | leaf asymmetry (average 5-6 leaves)                                                                                                                           | O (4 classes)        |  | W      |
| 59 | leaf colour - tinges of green (light to dark green) (average 5-6 leaves)                                                                                      | O (5 classes)        |  | W      |
| 60 | leaf colour (veil) - greyness (average 5-6 leaves)                                                                                                            | O (5 classes)        |  | W      |
| 61 | leaf dimension - area (average 5-6 leaves)                                                                                                                    | C (mm <sup>2</sup> ) |  |        |
| 62 | leaf dimension - center (horizontal) length (average 5-6 leaves)                                                                                              | C (mm)               |  | W      |
| 63 | leaf dimension - center (vertical) width (average 5-6 leaves)                                                                                                 | C (mm)               |  | W      |
| 64 | leaf dimension - length (average 5-6 leaves)                                                                                                                  | C (mm)               |  | W      |
| 65 | leaf dimension - thickness (average 5-6 leaves)                                                                                                               | C (mm)               |  | W      |
| 66 | leaf dimension - perimeter (average 5-6 leaves)                                                                                                               | C (mm)               |  |        |
| 67 | leaf dimension - width (average 5-6 leaves)                                                                                                                   | C (mm)               |  | W      |
| 68 | leaf edge - sawtooth gentle (absent, weak, medium, strong)                                                                                                    | O (3 classes)        |  | W      |
| 69 | leaf edge - sawtooth medium (absent, weak, medium, strong)                                                                                                    | O (3 classes)        |  | W      |
| 70 | leaf edge - sawtooth rough (absent, medium, strong)                                                                                                           | O (3 classes)        |  | W      |
| 71 | leaf edge - undulated-serrated (absent, medium, strong)                                                                                                       | O (3 classes)        |  | W      |
| 72 | leaf hair - density (average 5-6 leaves)                                                                                                                      | O (8 classes)        |  | W      |
| 73 | leaf hair type - antler branched (absent, sparsely to frequent)                                                                                               | O (5 classes)        |  | W      |
| 74 | leaf hair type - multi-branched (absent, sparsely to frequent)                                                                                                | O (9 classes)        |  | W      |
| 75 | leaf hair type - single branched (absent, sparsely to frequent)                                                                                               | O (5 classes)        |  | W      |
| 76 | leaf hair type - softness (rigid over soft to velvet)                                                                                                         | O (4 classes)        |  | W      |

|     |                                                                                                                                                                      |               |             |        |
|-----|----------------------------------------------------------------------------------------------------------------------------------------------------------------------|---------------|-------------|--------|
| 77  | leaf hair type - stickyness (very sticky = max.)                                                                                                                     | O (5 classes) |             | W      |
| 78  | leaf hair type - unbranched                                                                                                                                          | binary        |             | W      |
| 79  | leaf hair type - woolliness (strongly woolly = max.)                                                                                                                 | O (5 classes) |             | W      |
| 80  | leaf orientation - downward orientation                                                                                                                              | O (4 classes) |             | W      |
| 81  | leaf shape - circularity (leaf area over squared perimeter in relation to unit circle) (average 5-6 leaves)                                                          | C (%)         |             | W      |
| 82  | leaf shape - curvature (strongly curved = max.)                                                                                                                      | O (9 classes) |             | W      |
| 83  | leaf shape - guttershape                                                                                                                                             | O (7 classes) |             | W      |
| 84  | leaf shape - length over width quotient: minimal value of a) horizontal center over vertical center, b) horizontal center over vertical halfway (average 5-6 leaves) | C (%)         |             | W      |
| 85  | leaf shape - squared perimeter over area (average 5-6 leaves)                                                                                                        | C (%)         |             | W      |
| 86  | leaf shape - logarithm of squared perimeter over area (average 5-6 leaves)                                                                                           | C (%)         | from nr. 85 |        |
| 87  | leaf spots - redness                                                                                                                                                 | O (3 classes) |             | W      |
| 88  | leaf teeth - bending backwards                                                                                                                                       | O (3 classes) |             | W      |
| 89  | leaf teeth - bending downwards                                                                                                                                       | O (3 classes) |             | W      |
| 90  | leaf teeth - bending sideways (90°)                                                                                                                                  | O (3 classes) |             | W      |
| 91  | leaf teeth - depth (mean) (average 5-6 leaves)                                                                                                                       | C (mm)        |             | W      |
| 92  | leaf teeth - number per unit of leaf length (average 5-6 leaves)                                                                                                     | C (mm-1)      |             | W      |
| 93  | leaf teeth - spacing (irregular)                                                                                                                                     | O (3 classes) |             | W      |
| 94  | leaf teeth type - gentle (absent, partly present, present)                                                                                                           | O (3 classes) |             | W      |
| 95  | leaf teeth type - medium (absent, partly present, present)                                                                                                           | O (3 classes) |             | W      |
| 96  | leaf teeth type - rough (absent, partly present, present)                                                                                                            | O (3 classes) |             | W      |
| 97  | leaf venation pattern - degree of anastomosis (from feather pattern with nerves of first degree to fully connected anastomosing network, waffled pattern = max.)     | O (6 classes) |             | DA / W |
| 98  | petiole - height (average 5-6 leaves)                                                                                                                                | C (mm)        |             | W      |
| 99  | petiole - length (average 5-6 leaves)                                                                                                                                | C (mm)        |             | DA / W |
| 100 | petiole - width (average 5-6 leaves)                                                                                                                                 | C (mm)        |             | W      |
| 101 | internodium length - internod. 1 over internod. 2                                                                                                                    | C (%)         |             | W      |
| 102 | internodium length - internod. 2 over internod. 3                                                                                                                    | C (%)         |             | W      |
| 103 | stem - width (at internod. 6)                                                                                                                                        | C (mm)        |             | W      |
| 104 | stem (base) colour - intensity (light to dark green)                                                                                                                 | O (3 classes) |             | W      |
| 105 | stem (spot) colour - red (sparsely dotted to fully red)                                                                                                              | O (4 classes) |             | W      |
| 106 | stem (veil) colour - grey (weakly to strongly grey)                                                                                                                  | O (4 classes) |             | W      |
| 107 | stem glands - number on section 2mm thick (at internod. 6)                                                                                                           | C (n)         |             | DA / W |
| 108 | stem xylem - ribs weak to strong                                                                                                                                     | O (3 classes) |             | W      |
| 109 | odour - appreciation                                                                                                                                                 | O (9 classes) |             | W      |
| 110 | odour - strength                                                                                                                                                     | O (4 classes) |             | W      |
| 111 | odour - artificial / weird                                                                                                                                           | binary        |             | W      |
| 112 | odour type - carvon                                                                                                                                                  | binary        |             | W      |
| 113 | odour type - citrus                                                                                                                                                  | binary        |             | W      |
| 114 | odour type - menthol                                                                                                                                                 | binary        |             | W      |
| 115 | odour type - musty                                                                                                                                                   | binary        |             | W      |
| 116 | odour type - perfume incl. citrus                                                                                                                                    | binary        |             | W      |

|     |                                                       |        |  |   |
|-----|-------------------------------------------------------|--------|--|---|
| 117 | odour type - stenchy                                  | binary |  | W |
| 118 | odour type - thymol                                   | binary |  | W |
| 119 | plant - habitus (strong, intermediary, weak) : strong | binary |  | W |
| 120 | plant - habitus (strong, intermediary, weak) : weak   | binary |  | W |
| 121 | plant - height                                        | C (cm) |  | W |
| 122 | plant - inflorescence length                          | C (mm) |  |   |
