# Supplementary material for: A Revised Phylogeny of the Mentha spicata Clade Reveals Cryptic Species
Source: MDPI journal article supplement (doi:10.3390/plants10040819), 2021-04-20
Supplement: s1 [file s1]

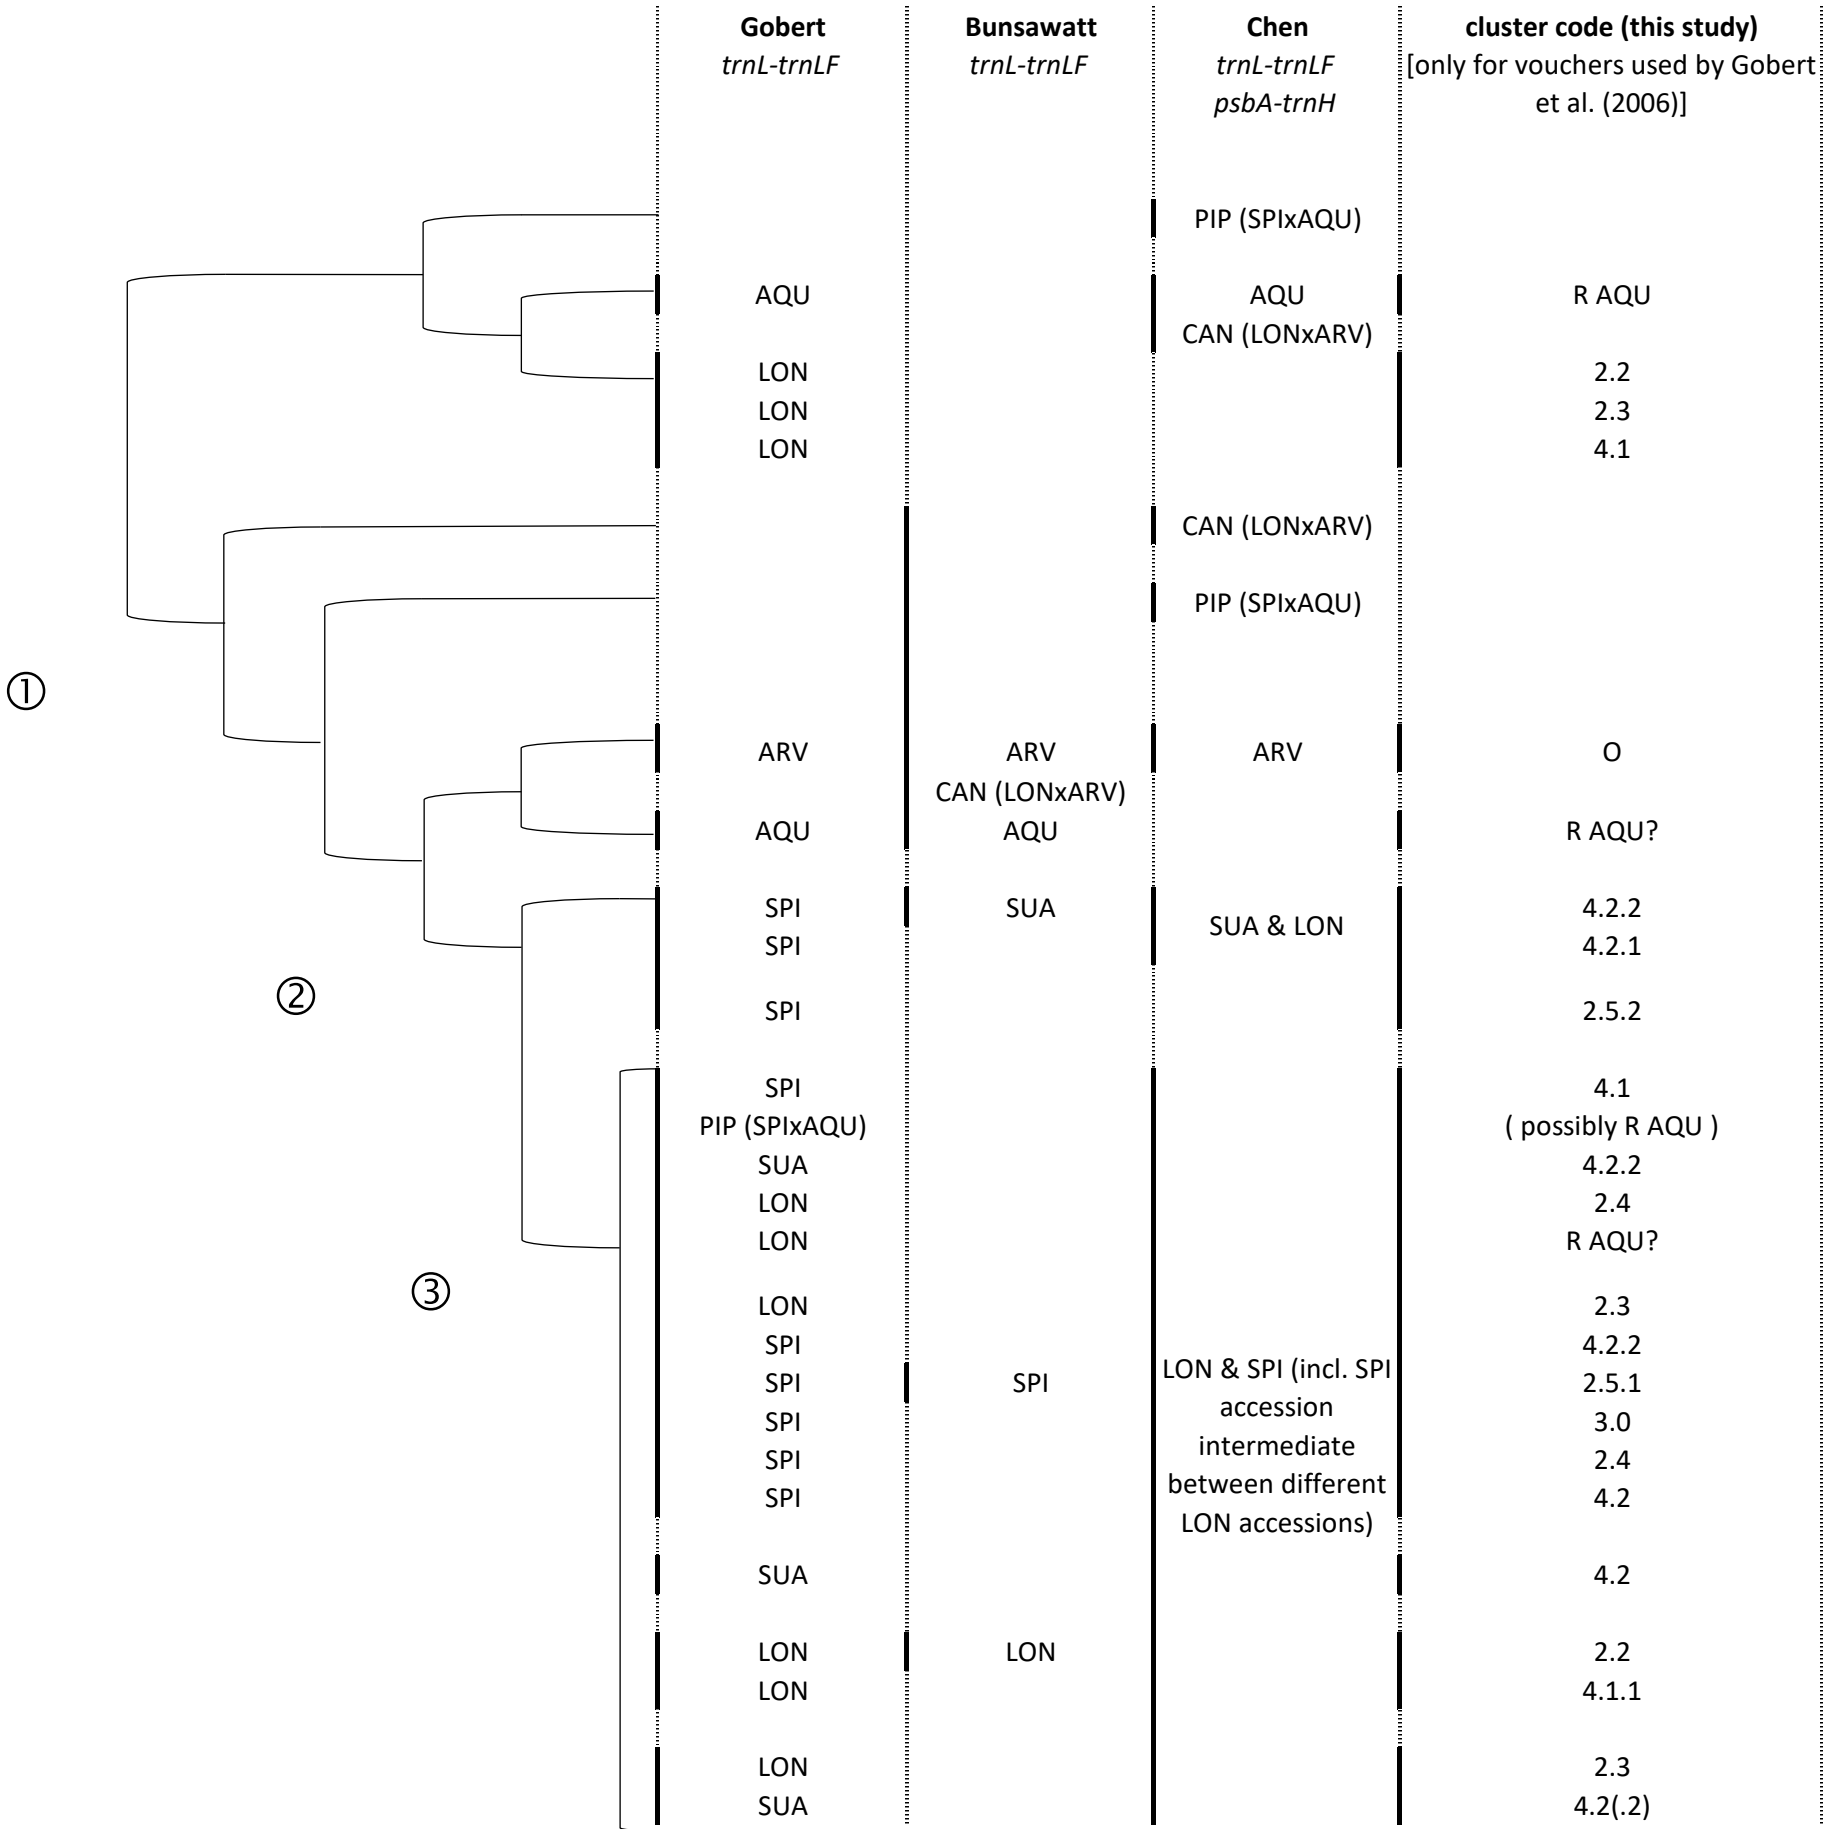

Legend :

|     |                        |
|-----|------------------------|
| AQU | <i>M. aquatica</i>     |
| ARV | <i>M. arvensis</i>     |
| CAN | <i>M. × canadensis</i> |
| LON | <i>M. longifolia</i>   |
| PIP | <i>M. × piperita</i>   |
| SPI | <i>M. spicata</i>      |
| SUA | <i>M. suaveolens</i>   |
