# Supplementary figures and images for: A Revised Phylogeny of the Mentha spicata Clade Reveals Cryptic Species
Source: MDPI journal article supplement (doi:10.3390/plants10040819), 2021-04-20

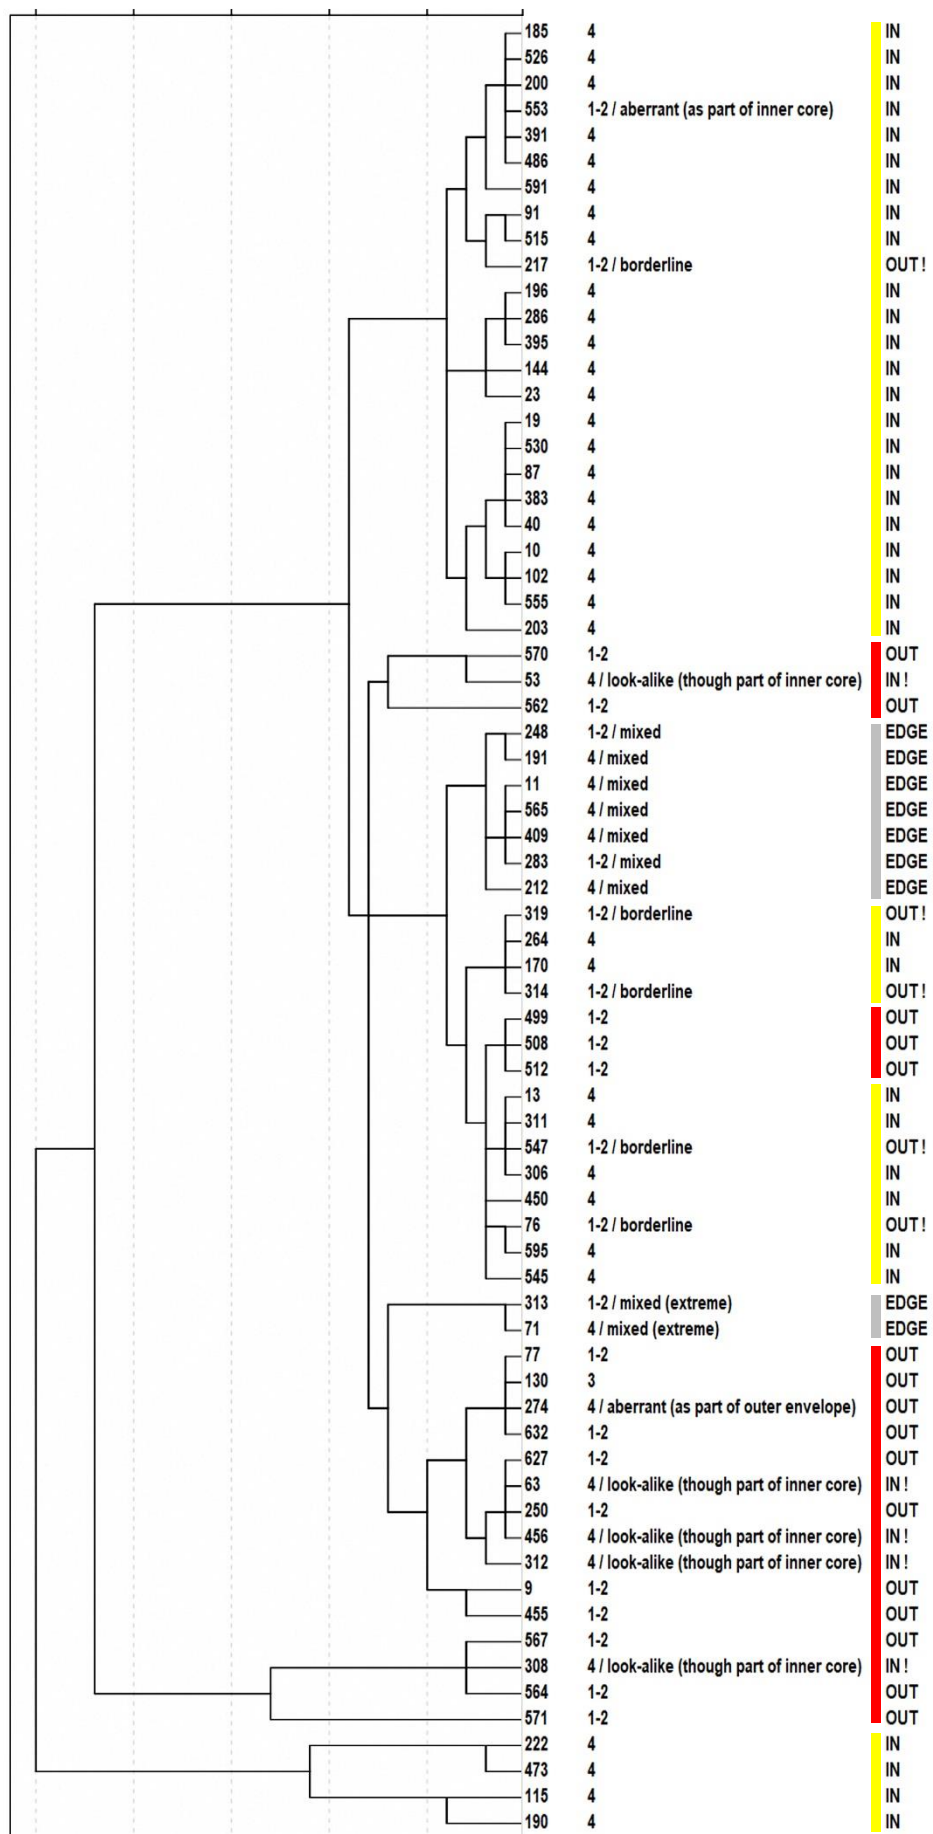

Supplement: s1 [file s1]
